# Supplementary material for: Regional Variation in Aortic AT1b Receptor mRNA Abundance Is Associated with Contractility but Unrelated to Atherosclerosis and Aortic Aneurysms
Source: PubMed Central journal article supplement (PMC3485205; doi:10.1371/journal.pone.0048462), 2012-10-31
Supplement: pone.0048462.s001.pdf [file pone.0048462.s001.pdf]

A

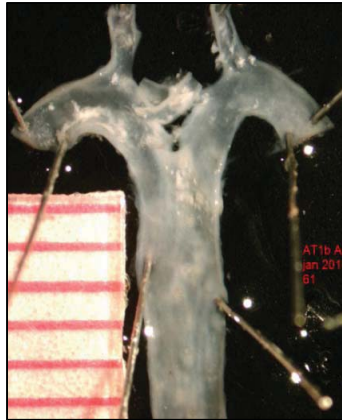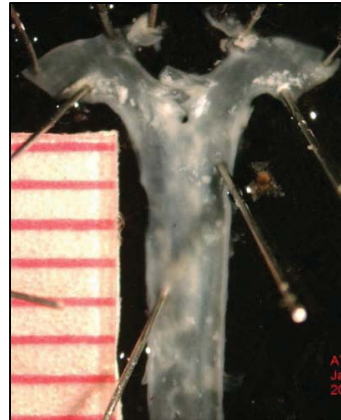

+/+

-/-

AT1b Receptor Genotype

B

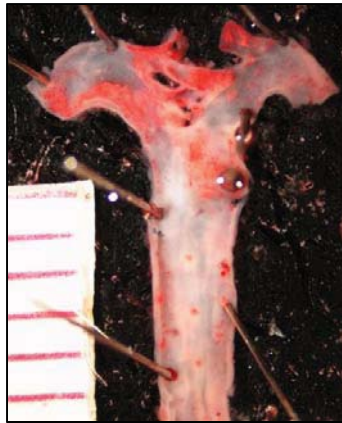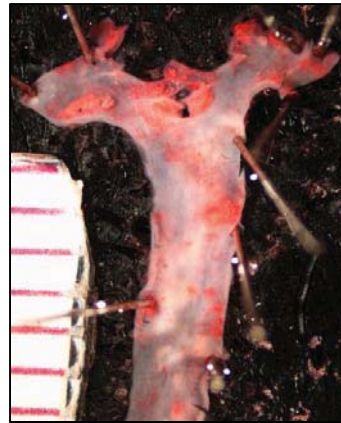

+/+

-/-

AT1b Receptor Genotype

**Figure S1. Images of en face aortas.** (A) Examples of en face aortas without any staining. Atherosclerotic lesions of which represent values near the mean of each group. (B) En face aortas with Oil Red O staining. These aortas are the same as shown in (A).
