# Supplementary material for: Regional Variation in Aortic AT1b Receptor mRNA Abundance Is Associated with Contractility but Unrelated to Atherosclerosis and Aortic Aneurysms
Source: PubMed Central journal article supplement (PMC3485205; doi:10.1371/journal.pone.0048462), 2012-10-31
Supplement: pone.0048462.s002.pdf [file pone.0048462.s002.pdf]

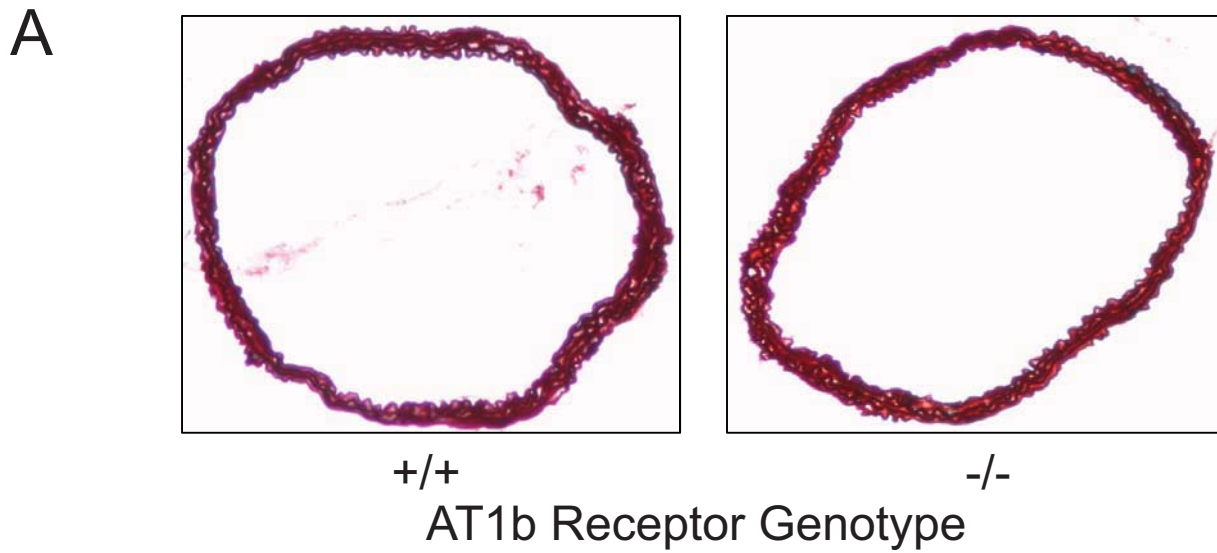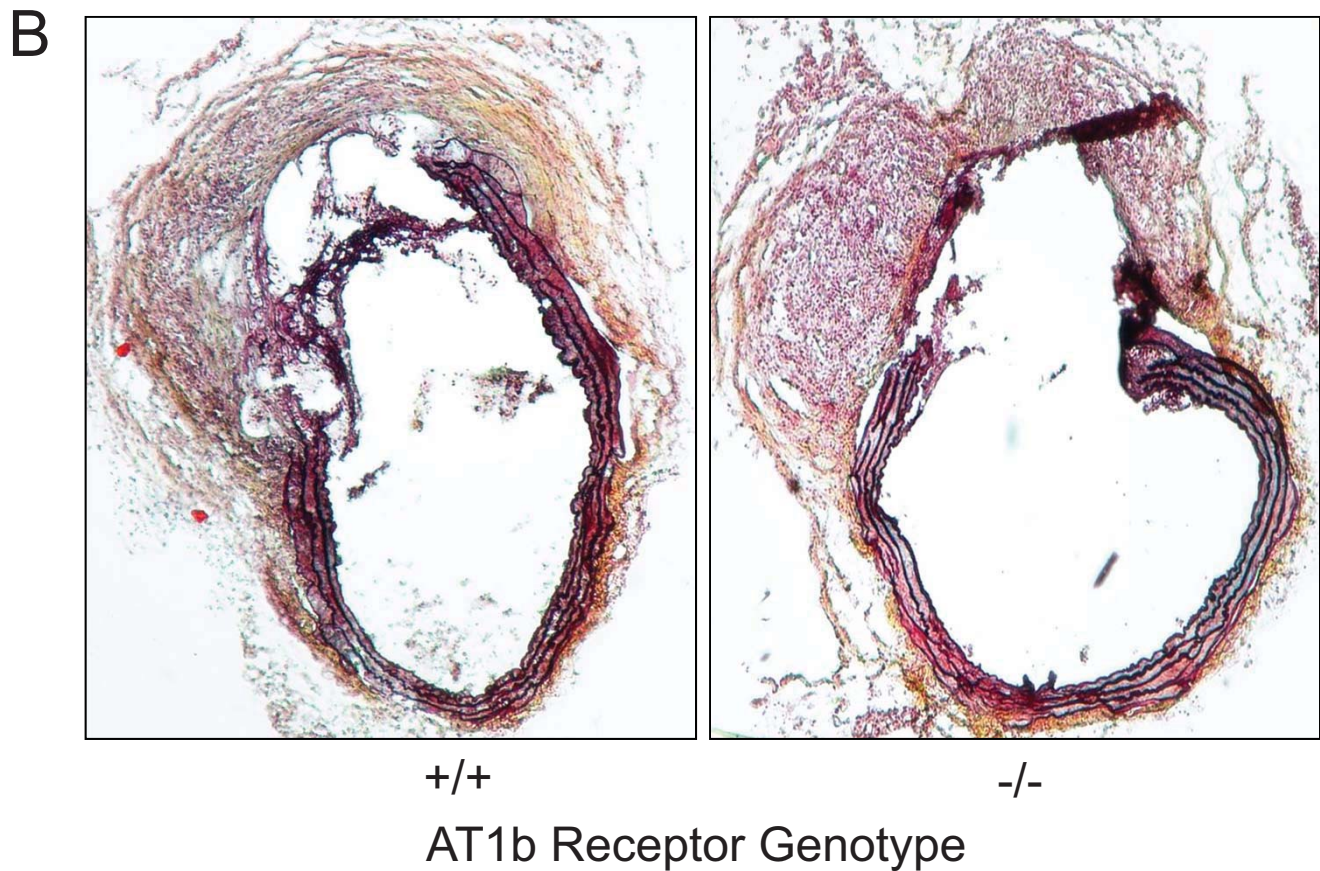

**Figure S2. Movat's pentachrome staining of supra-renal aortic sections.** (A) Images of supra-renal aortas from AT1b receptor +/+ or -/- mice prior to AngII infusion (40X). (B) Images of AAAs from AT1b receptor +/+ or -/- mice after 28 days of AngII infusion (40X).
